# Supplementary material for: Aromatic Modification of Low Molecular Weight PEI for Enhanced Gene Delivery
Source: MDPI journal article supplement (doi:10.3390/polym9080362), 2017-08-15
Supplement: s1 [file s1]

# Supplementary Materials: Aromatic Modification of Low Molecular Weight PEI for Enhanced Gene Delivery

Qing-Ying Yu, Yu-Rong Zhan, Ji Zhang, Chao-Ran Luan, Bing Wang, and Xiao-Qi Yu

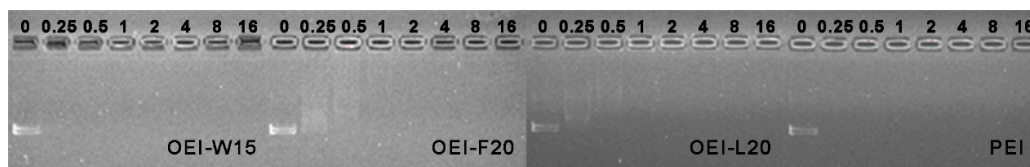

**Figure S1.** DNA condensation by polycations at various weight ratios evaluated by agarose gel retardation assay.

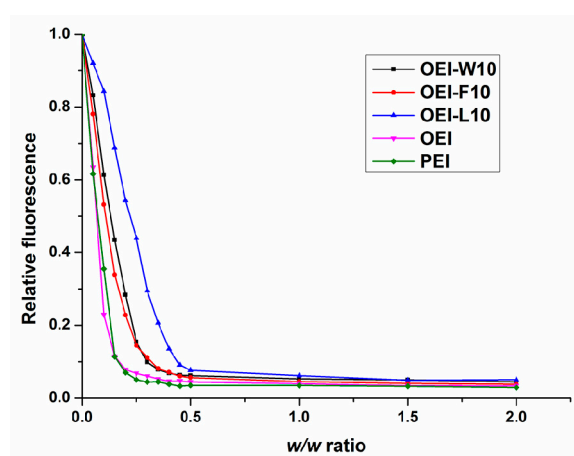

**Figure S2.** Fluorescence quenching assay of EB/DNA by addition of polycations.

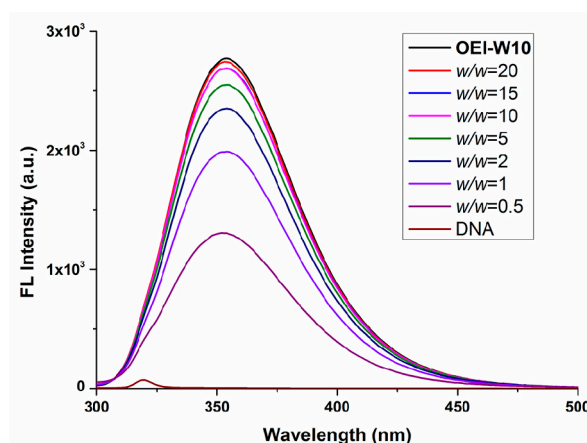

**Figure S3.** Fluorescence spectra of OEI-W10 upon the addition of CT DNA in 2.5 mL Hepes solution (excited at 288 nm) at room temperature.

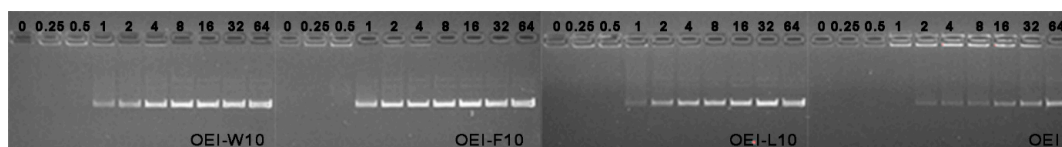

**Figure S4.** Release of DNA from polyplexes with the addition of heparin at various heparin/DNA weight ratios.  $w/w = 0, 0.25, 0.5, 1, 2, 4, 8, 16, 32, 64$ ; polymer/DNA:  $w/w = 1$

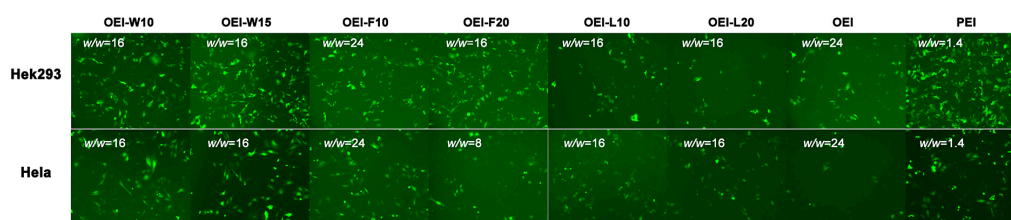

**Figure S5.** Fluorescence microscopy image of pEGFP-transfected HEK293 and HeLa cells in the absence serum.

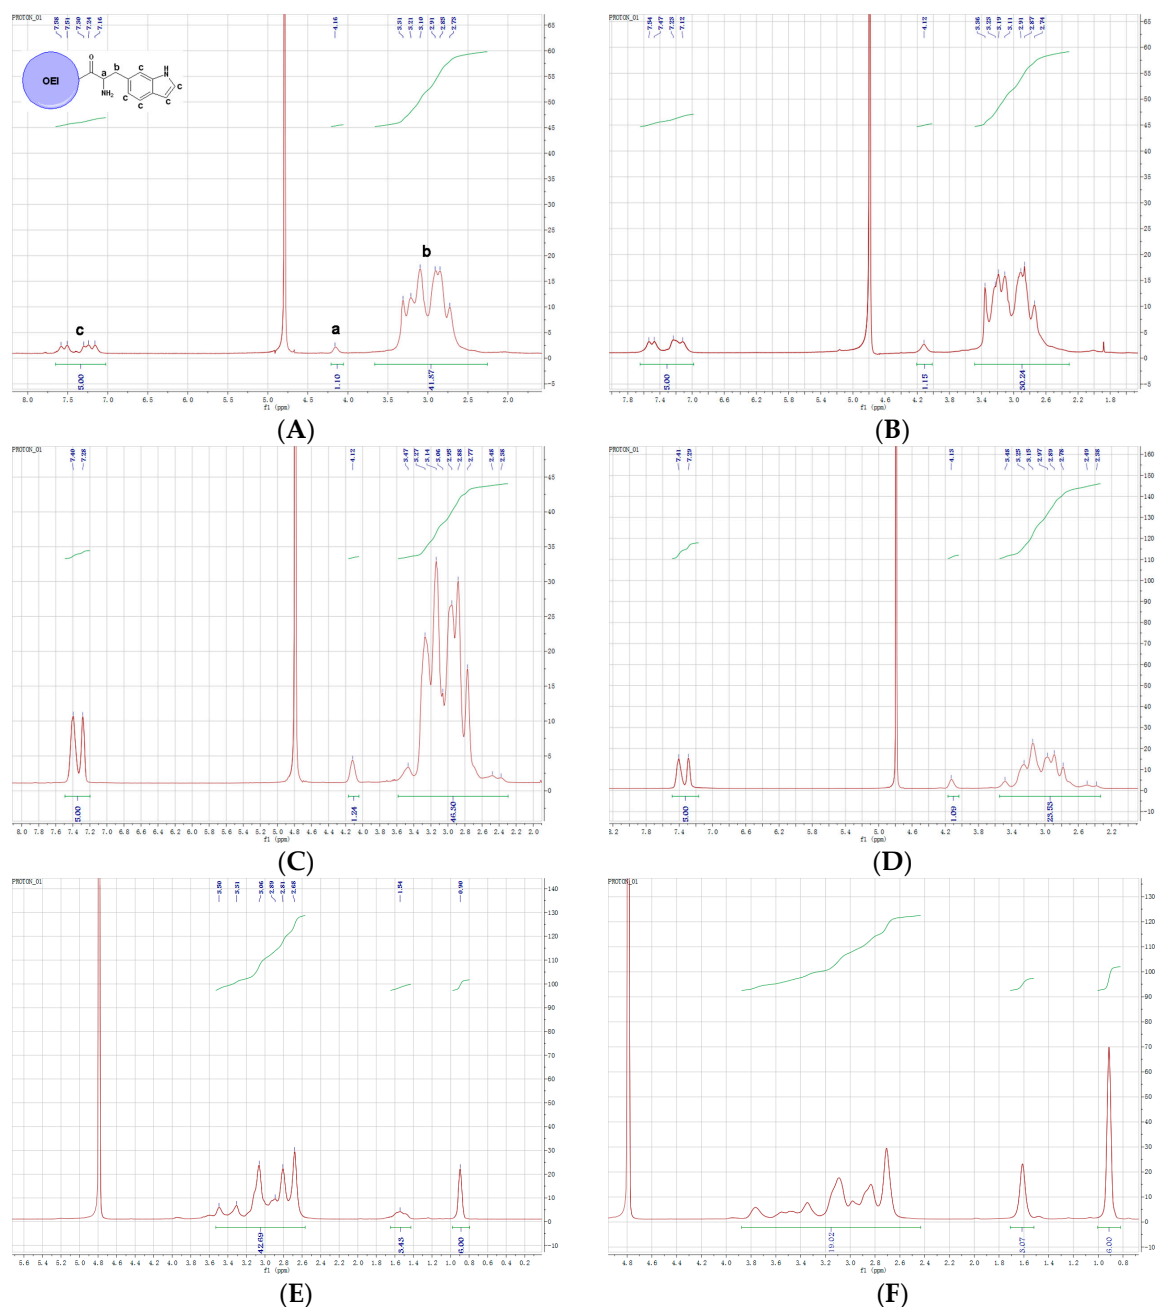

**Figure S6.** (A)  $^1\text{H}$  NMR spectra (400 MHz,  $\text{D}_2\text{O}$ ) of OEI-W10; (B)  $^1\text{H}$  NMR spectra (400 MHz,  $\text{D}_2\text{O}$ ) of OEI-W15; (C)  $^1\text{H}$  NMR spectra (400 MHz,  $\text{D}_2\text{O}$ ) of OEI-F10; (D)  $^1\text{H}$  NMR spectra (400 MHz,  $\text{D}_2\text{O}$ ) of OEI-F20; (E)  $^1\text{H}$  NMR spectra (400 MHz,  $\text{D}_2\text{O}$ ) of OEI-L10; (F)  $^1\text{H}$  NMR spectra (400 MHz,  $\text{D}_2\text{O}$ ) of OEI-L20. The characteristic multiplet of  $\delta$  7.58-7.16 represents the 5H on indole ring of tryptophan (W), while the broad multiplet represents the C-H of PEI (4H for each ethylenimine unit) and 2H on the  $-\text{CHCH}_2-$  on W. The SD can be calculated from the ratio between these peak areas. e.g.: In this case, for OEI-W10,  $\text{SD} = n(\text{W})/n(\text{ethylenimine units on OEI}) = (5/5)/[(41.87-2)/4] \approx 0.10$ , i.e. 10%.
